# Supplementary material for: Serum Dickkopf-1 in Combined with CA 19-9 as a Biomarker of Intrahepatic Cholangiocarcinoma
Source: Cancers (Basel). 2021 Apr 12;13(8):1828. doi: 10.3390/cancers13081828 (PMC8069292; doi:10.3390/cancers13081828)
Supplement: Supplementary file 1 [file cancers-13-01828-s001.pdf]

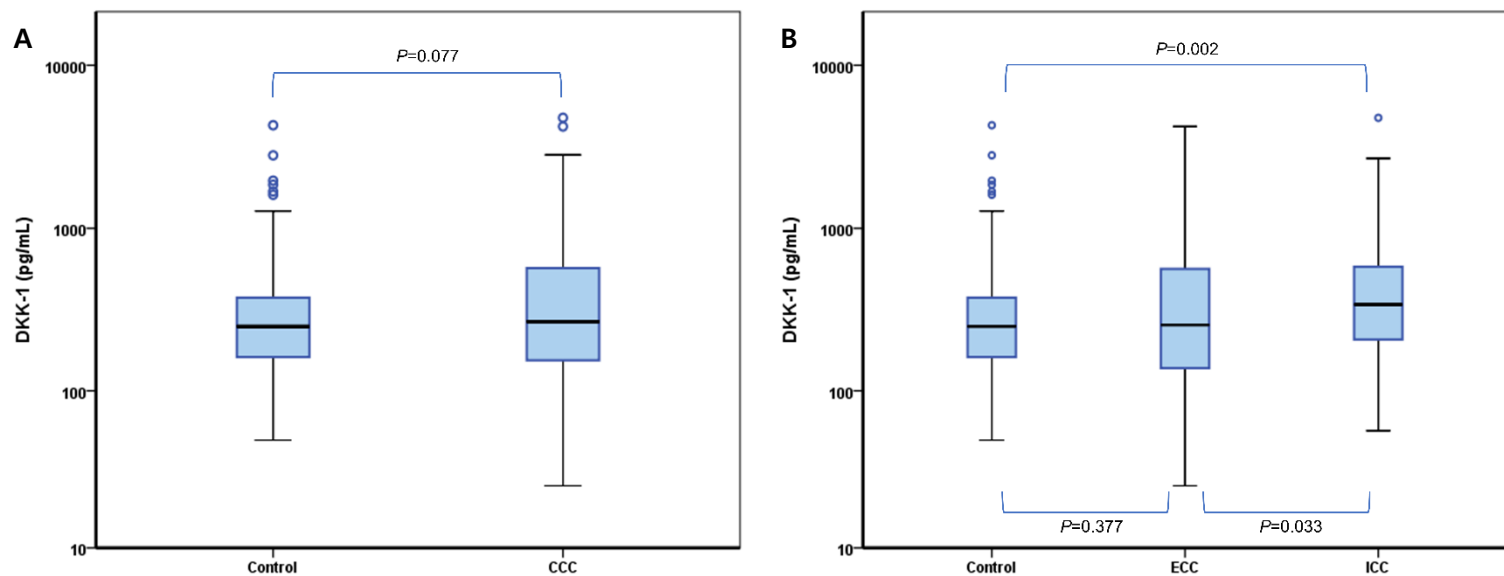

**Figure S1.** Serum DKK-1 level. (A) The median level of DKK-1 in the control group (n=200) and in patients with CCC (n=356) were 249.8 pg/mL and 267.2 pg/mL, respectively. ( $P=0.077$ ) (B) When patients with CCC were divided into the ECC group (n=277) and ICC group (n=79), the median levels of DKK-1 were 255.0 pg/mL and 340.5 pg/mL, respectively, and there was a significant difference between the control group and the ICC group. ( $P=0.002$ ) DKK-1, Dickkopf-related protein 1; CCC, cholangiocarcinoma; ECC, extrahepatic cholangiocarcinoma; ICC, intrahepatic cholangiocarcinoma.

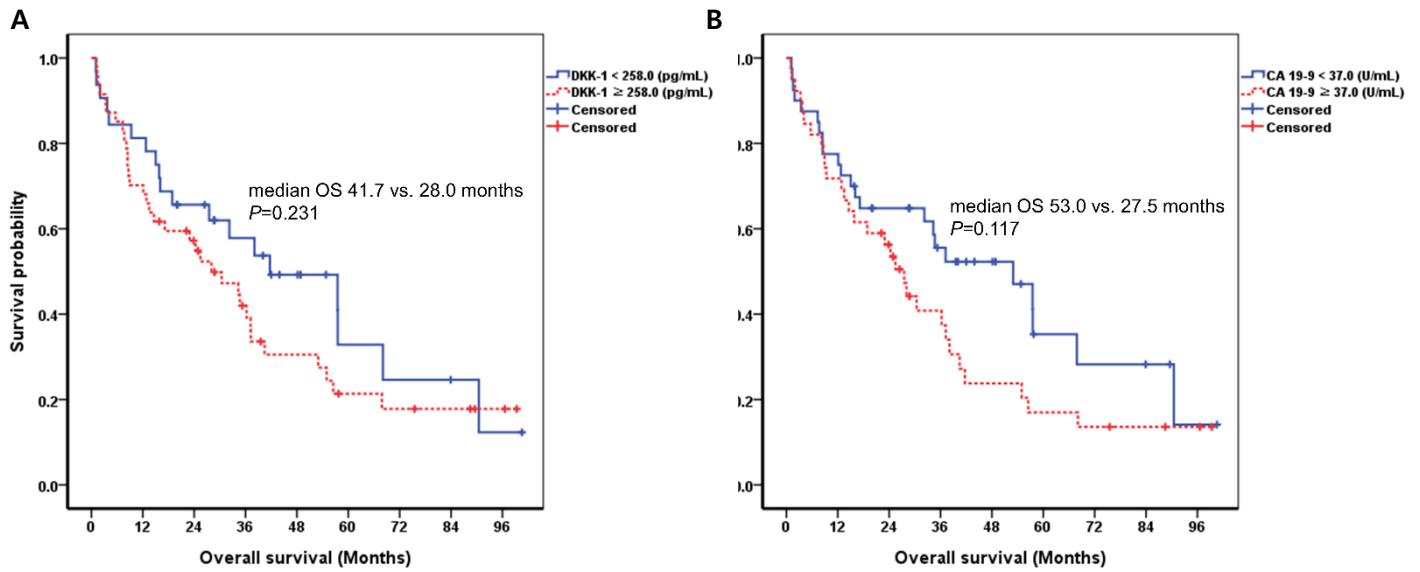

**Figure S2.** Correlation between DKK-1 and CA 19-9 level and the survival of patients with ICC using the Kaplan-Meier curve. The cutoff value of DKK-1 and CA 19-9 were 258.0 pg/mL and 37.0 U/mL, respectively. (A) The median survival of the low and high DKK-1 expression groups were 41.7 and 28.0 months, respectively, and there was no significant difference between the groups ( $P=0.231$  by log-rank test). (B) The median survival of the low and high CA 19-9 expression groups were 53.0 and 27.5 months, respectively, and there was no significant difference between the groups ( $P=0.117$  by log-rank test). DKK-1, Dickkopf-related protein 1; CA 19-9, carbohydrate antigen 19-9; ICC, intrahepatic cholangiocarcinoma; OS, overall survival.

**Table S1.** Etiologies of cholangiocarcinoma and serum levels of biomarkers.

|                | Sporadic   | HBV      | HCV      | Liver fluke | Liver cirrhosis | PSC    | Bile duct stone |
|----------------|------------|----------|----------|-------------|-----------------|--------|-----------------|
| DKK-1 (pg/mL)  | 218.9      | 219.0    | 70.7     | 318.4       | 256.5           | -      | 525.6           |
| CA 19-9 (U/mL) | 51.3       | 171.3    | 2746.0   | 95.4        | 203.7           | -      | 89.4            |
| OS (months)    | 43.4       | 51.9     | 18.9     | 24.3        | 35.2            | -      | 36.5            |
| n (%)          | 75 (78.9%) | 5 (5.3%) | 1 (1.1%) | 1 (1.1%)    | 6 (6.3%)        | 0 (0%) | 7 (7.4%)        |

DKK-1, Dickkopf-related protein 1; CA 19-9, carbohydrate antigen 19-9; HBV, Hepatitis B virus; HCV, Hepatitis C virus; PSC, Primary sclerosing cholangitis.

**Table S2.** Performance characteristics of DKK-1 and CA 19-9

|                    | Sensitivity (%) | Specificity (%) | PPV (%) | NPV (%) | Positive LR | Negative LR |
|--------------------|-----------------|-----------------|---------|---------|-------------|-------------|
| DKK-1              | 59.5            | 56.9            | 40.5    | 74.0    | 1.38        | 0.71        |
| CA 19-9            | 49.4            | 98.8            | 95.1    | 79.8    | 41.17       | 0.51        |
| DKK-1 plus CA 19-9 | 74.7            | 56.3            | 45.7    | 81.8    | 1.71        | 0.45        |

DKK-1, Dickkopf-related protein 1; CA 19-9, carbohydrate antigen 19-9; PPV, positive predictive value; NPV, negative predictive value; LR, likelihood ratio.
